# Supplementary material
Source: publisher figshare collection journal article supplement (https://frontiersin.figshare.com/ndownloader/files/26818964)
Supplement: Supplementary file [file 26818964]

**Supplementary Table 2. Background of cytokines in unstimulated condition (validation cohort).**

|                                 | Median [P25-P75]     |
|---------------------------------|----------------------|
| <b>IFN-<math>\gamma</math></b>  | 10<br>[10-39]        |
| <b>IP-10</b>                    | 4311<br>[2133-9154]  |
| <b>MIG</b>                      | 6577<br>[2021-15893] |
| <b>MIP-1<math>\alpha</math></b> | 27<br>[10-47]        |
| <b>TNF-<math>\alpha</math></b>  | 73<br>[32-131]       |

Results of the measured concentrations are reported in pg/ml as medians and 25th – 75th percentiles.
